# Supplementary material for: High-detectivity tin disulfide nanowire photodetectors with manipulation of localized ferroelectric polarization field
Source: publisher site journal article supplement (doi:10.1515/nanoph-2021-0480), 2021-11-03
Supplement: Supplementary file 1 [file j_nanoph-2021-0480_suppl.doc]

**Supplementary Materials**

Dingshan Zheng, Hailu Wang, Ruoling Chen, Long Li, Jiaxiang Guo, Yue Gu, Muhammad M. Zubair, Xiangxiang Yu, Long Jiang, Desheng Zhu, Yan Xiong, Han Zhang, Wenxing Yang*, Jinshui Miao*

**High-detectivity Tin disulfide nanowire photodetectors with manipulation of localized ferroelectric polarization field**

**Dingshan Zheng, Hailu Wang,** and **Ruoling Chen** are equally contributed to this work.

***Corresponding authors: Wenxing Yang,** School of Physics and Optoelectronic Engineering, Yangtze University, Jingzhou 434023, China, E-mail: wenxingyang2@126.com; **Jinshui Miao,** State Key Laboratory of Infrared Physics, Shanghai Institute of Technical Physics, Chinese Academy of Sciences, Shanghai 200083, China, E-mail: jsmiao@mail.sitp.ac.cn

**Dingshan Zheng, Ruoling Chen, Long Li, Xiangxiang Yu, Long Jiang, Desheng Zhu, and Yan Xiong,** School of Physics and Optoelectronic Engineering, Yangtze University, Jingzhou 434023, China

**Hailu Wang, Jiaxiang Guo, Yue Gu, and Muhammad M. Zubair,** State Key Laboratory of Infrared Physics, Shanghai Institute of Technical Physics, Chinese Academy of Sciences, Shanghai 200083, China

**Han Zhang,** Institute of Microscale Optoelectronics, College of Physics and Optoelectronic Engineering, Shenzhen University, Shenzhen 518060, China

Figure S1: Ferroelectric polarization properties of P(VDF-TrFE) ferroelectric polymer film.

Figure S2: Retention properties of ferroelectric side-gated SnS2 NW photodetector after depletion.

Figure S3: Linear curve of the transfer properties of ferroelectric side-gated SnS2 NW photodetector.

Figure S4: Schematic diagrams of the ferroelectric side-gated SnS2 nanowire structure before depletion and after depletion.

Figure S5: Low-frequency noise power density spectra of the SnS2 NW photodetector under different bias voltages.

Figure S6: Photoresponse properties of ferroelectric side-gated SnS2 NW photodetector after depletion under deep ultraviolet illumination (280 nm).


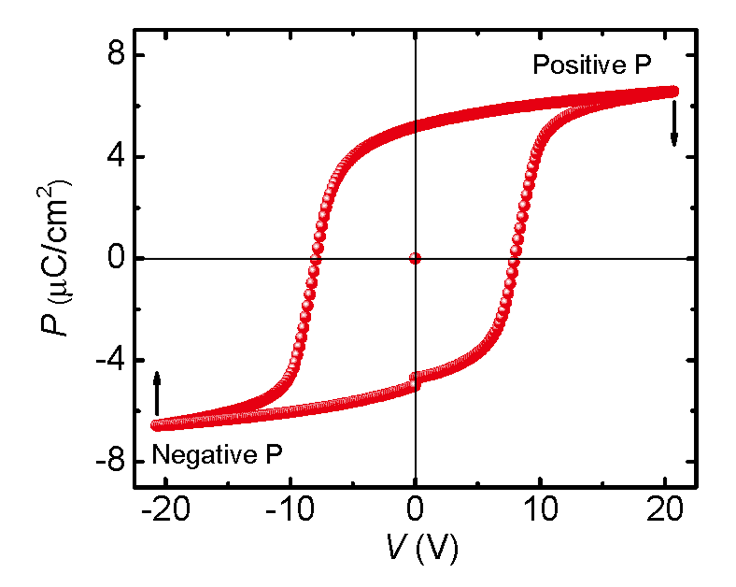


**Figure S1:** Ferroelectric polarization properties of P(VDF-TrFE) ferroelectric polymer film.


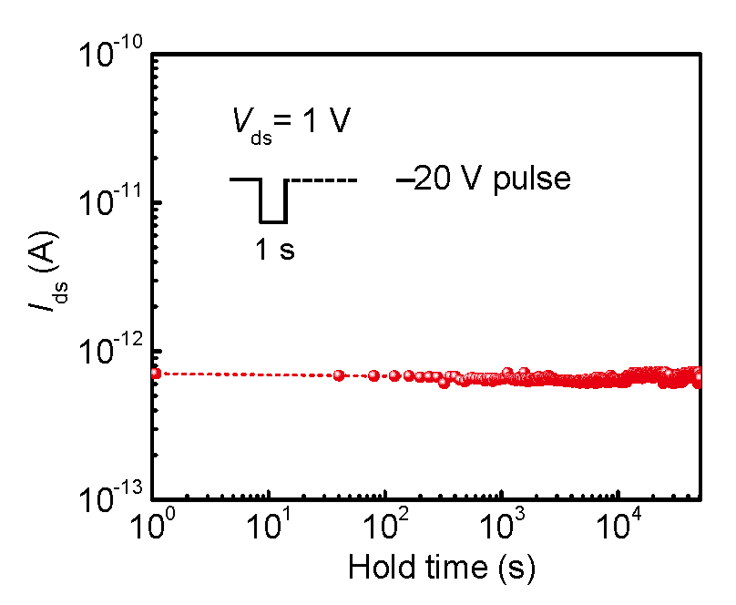


**Figure S2:** Retention properties of ferroelectric side-gated SnS2 NW photodetector after depletion.


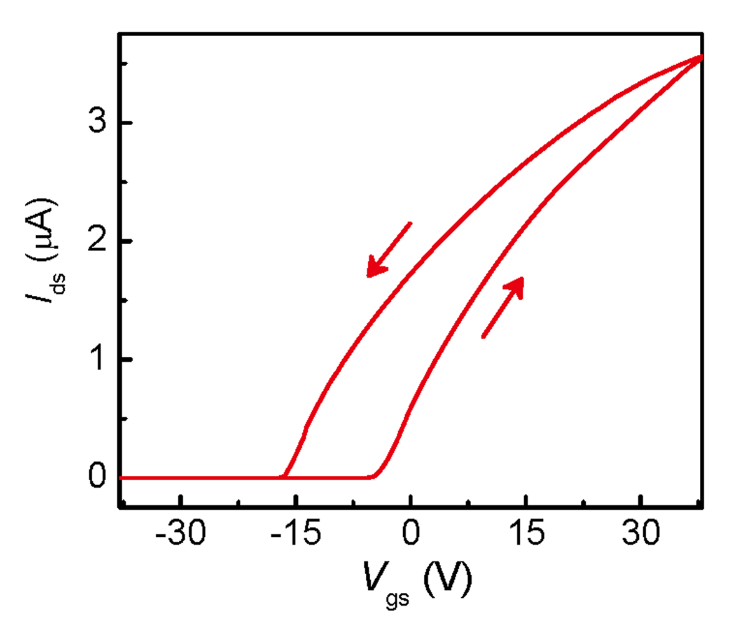


**Figure S3:** Linear curve of the transfer properties of ferroelectric side-gated SnS2 NW photodetector.


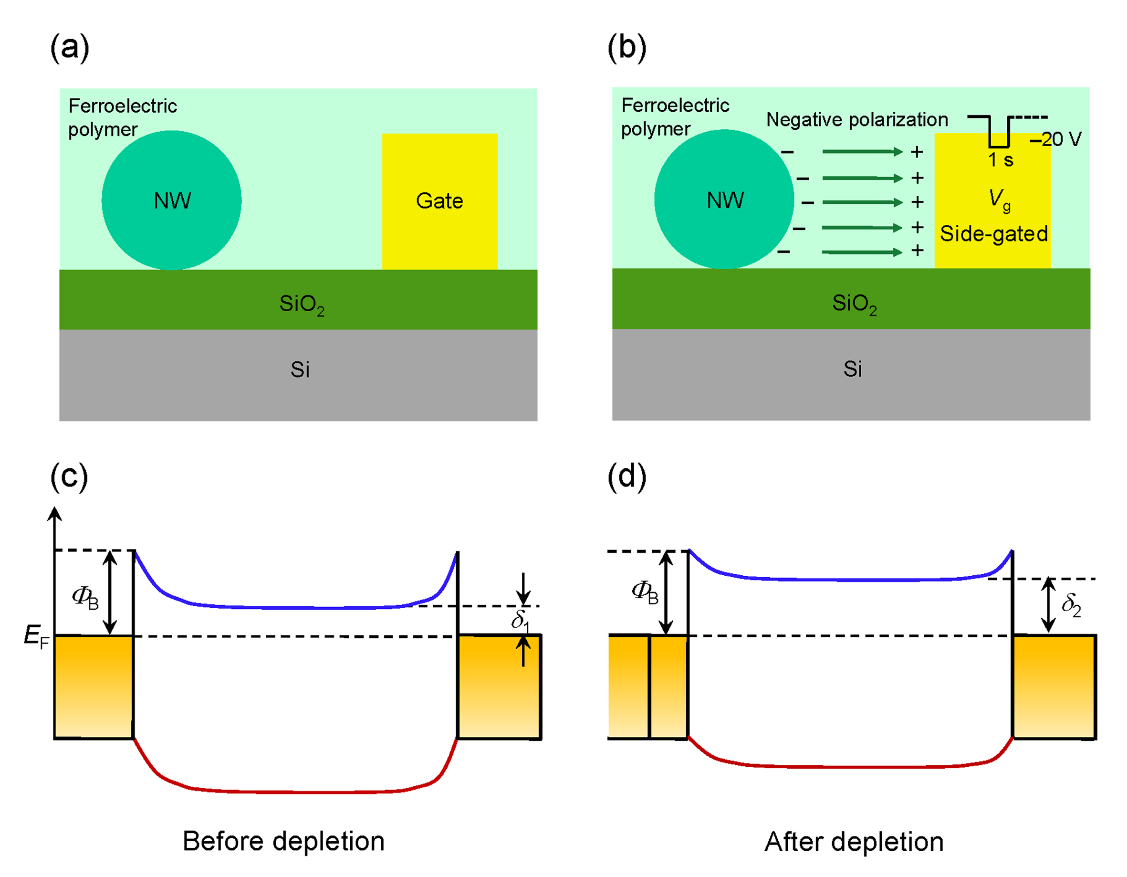


**Figure S4:** Schematic diagrams of the ferroelectric side-gated SnS2 nanowire structure before depletion (a) and after depletion (b).


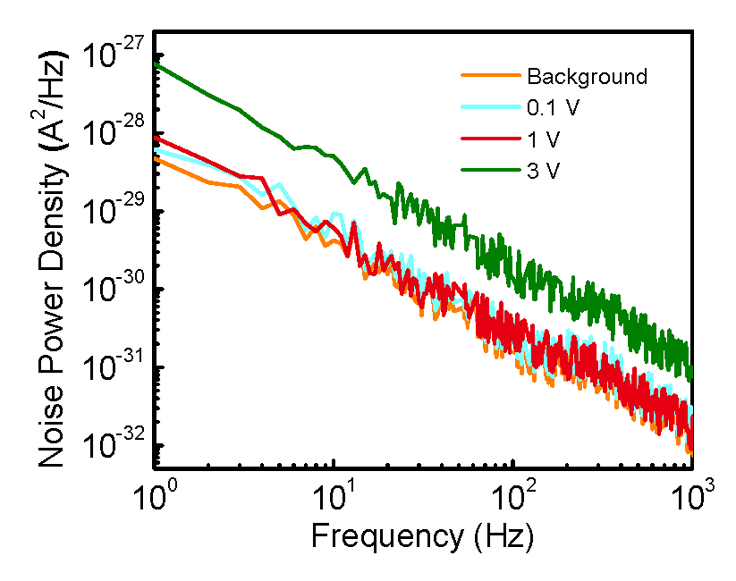


**Figure S5:** Low-frequency noise power density spectra of the SnS2 NW photodetector under different bias voltages. The low-frequency noise characteristics of the device at 0.1 V and 1 V bias are close to the background noise at 0 V bias. However, the noise is much higher at 3 V bias.


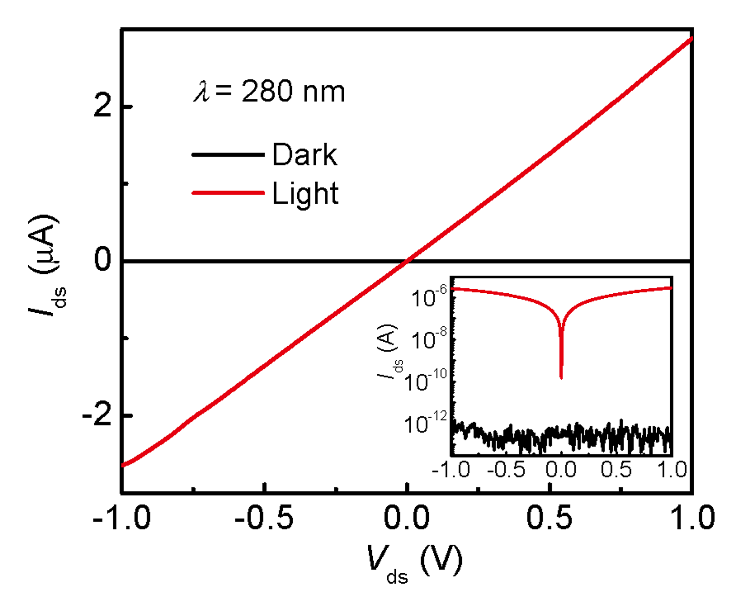


**Figure S6:** Photoresponse properties of ferroelectric side-gated SnS2 NW photodetector after depletion under deep ultraviolet illumination (280 nm).
